# Supplementary material
Source: HighWire-hosted journal article supplement (https://www.qdcxjkg.com/highwire/filestream/113561/field_highwire_adjunct_files/9/33_AppealCourt1948.pdf)

Reference no. 33 of

Winkelmann A, Noack T: The Clara cell – a 'Third Reich eponym'? *Eur Respir J* 2010; 36: 722–727

Berufungskammer [Appeal Court] München: Verdict of 3 June 1948. 1948. *Archive*: Staatsarchiv, München. *Signature*: Spruchkammerakt Dr. Max Clara, Spruchkammern Kt. 244.

### **Short comment by the authors:**

The denazification process in occupied post-war Germany was based on the Law for Liberation from National Socialism and Militarism of 5 March 1946 (p. 1). Decisions were made by special lay courts ("*Spruchkammer*"). Appeals were dealt with by professional appeal courts ("*Berufungskammer*"). A *Spruchkammer* had classified Max Clara as *Mitläufer* ([Nazi] follower) on 26 June 1947.

The decision of the *Berufungskammer* (appeal court) cleared Clara of being a follower. The reasoning (*Begründung*, p. 2) of the court gives two main reasons for this decision. First, Clara had not been *Gaudozentenführer* (district leader of lecturers), but only *kommissarischer Gaudozentenführer* (acting district leader of lecturers). Second, the court believed that he had "offered resistance to the National Socialist dictatorship" (*aktiven Widerstand gegen die nationalsozialistische Gewaltherrschaft geleistet*, p. 2). The court explicitly bases this decision on several "affidavits" (*eidesstattliche Erklärungen*).

## Die Berufungskammer

München

Urschrift

26. 6. 1948.

(Datum)

Ber.-Reg.-Nr. 3066 / 47

Aktenzeichen I. Instanz

Auf Grund des Gesetzes zur Befreiung von Nationalsozialismus und Militarismus vom 5. März 1946 erläßt die

Berufungskammer München, bestehend aus

1. Dr. Plügge als Vorsitzender
2. Banauer als Beisitzer
3. Niemeier als Beisitzer
4. als Beisitzer
5. als Beisitzer
6. als öffentlicher Kläger
7. als Protokollführer

gegen Professor Dr. Max Clara, geb. 12.2.1899 in Plunau,  
be. Bozen, wohnhaft München, Rembrandtstr. 13

auf Grund der mündlichen Verhandlung — im schriftlichen Verfahren — folgenden

## Spruch:

- 1) Auf die Berufung des Betroffenen wird der Spruch der Spruchkammer München VII vom 26. 6. 1947 aufgehoben.
- 2) Der Betroffene wird in die Gruppe der Entlasteten eingereiht. Das Verfahren gegen ihn wird eingestellt.
- 3) Die Berufung des öffentlichen Klägers wird zurückgewiesen.
- 4) Die Kosten der Berufung

trifft die Staatskammer.  
5) Streitwert: 40.000. RM.

R. Thier

Heuer Heuer  
Meyer.

Begründung:  
=====

Der durch die Berufung des Betroffenen angefochtene Spruch wird durch den festgestellten Tatbestand nicht gerechtfertigt.

Der Betroffene fällt als Dozentenführer gemäß E II 8 und als Mitglied der NSDAP ab 1935 gemäß D II 4 der Liste A der Anlage zum Gesetz in Klasse II, damit vermutungsgemäß in Gruppe II. Zum Gaudozentenführer ist er nicht ordnungsgemäß ernannt worden, sondern er hat diesen Posten nur kurze Zeit kommissarisch bekleidet. Er fällt als solcher nicht unter E II 8 in Klasse I. Es ist daher ein Rechtsirrtum, wenn der angefochtene Spruch in seiner Begründung ausführt, der Betroffene falle in Klasse I und der Vermutung nach in die Gruppe der Hauptschuldigen. Die gesetzliche Vermutung hinsichtlich der Gruppe II ist aber widerlegt, wie es auch die Begründung des angefochtenen Spruches zutreffend ausführt.

Erwiesen ist ferner, dass der Betroffene nach dem Mass seiner Kräfte aktiven Widerstand gegen die nationalsozialistische Gewaltherrschaft geleistet hat. Es genügt, hierbei zur Begründung auf die zahlreichen, bei den Akten befindlichen eidesstattlichen Erklärungen (die in der Begründung des angefochtenen Spruches auch aufgeführt sind) und deren zutreffende Erklärungen Würdigung durch die Spruchkammer Bezug zu nehmen.

In Ergänzung hierzu ist noch festzustellen, dass der Betroffene während seiner Tätigkeit als Dozentenführer in Leipzig nur sachliche Gesichtspunkte gelten liess, dass er z. Bsp. die Habilitierung von wissenschaftlich nicht entsprechend qualifizierten, aber der Partei genehmen, oder erwünschten Bewerbern verhindert hat, dass er unerschrocken auch für politisch missliebiger Kollegen eingetreten ist. Der Betroffene hat dadurch wirksam dazu beigetragen, die Universität auf ihrem bisherigen hohen wissenschaftlichen Niveau zu halten. Seinen Bemühungen ist es ferner mit zu verdanken, dass entgegen den Plänen des Vizeleiters die theologische Fakultät der Universität Leipzig erhalten und deren juristische Fakultät nicht geschlossen wurde. Das alles bedeutete einen zähen dauernden und nicht ungefährlichen Kampf gegen die Parteigrüssen, wodurch er diesen verdächtigt wurde. Der Betroffene hat als in seinem Kampf gegen die nationalsozialistische Gewaltherrschaft in einem besonders wichtigen Bezirk des Kulturlebens sich bewusst Gefahren ausgesetzt. Aktiver Widerstand nach Massgabe seiner Kräfte ist somit in besonderem Umfang erwiesen.

Durch seinen Widerstand hat der Betroffene aber auch Nachteile erlitten. Im Sinne des Gesetzes sind hierunter nicht nur materielle Nachteile zu verstehen, sondern auch ideelle, sowie Beeinträchtigungen jeder Art. Der Betroffene wurde wegen seines der nationalsozialistischen Gewaltherrschaft



feindlichen Verhaltens von einem Parteigericht im Jahre 1942 mit einer Verwarnung bestraft. Bei dieser Sachlage war die Stellung des Betroffenen sehr gefährdet. (vgl. z.Bsp. die eidesstattliche Erklärung von Prof. Hueck- Leipzig.) Im Zusammenhang damit musste er seine Stellung in Leipzig aufgeben. Die Versetzung nach München war unter den damaligen Verhältnissen keine berufliche Verbesserung, wobei es dahingestellt bleiben mag, dass und ob der Betroffene dadurch auch materielle Nachteile erlitten hat. - Die mit der Verfolgung durch die Partei verbundene jahrelange Unruhe, Spannung und Unsicherheit bedeuten aber für einen geistig arbeitenden Menschen, wie den Betroffenen schwere Nachteile. Er wurde zudem nicht nur aus seiner gewohnten Tätigkeit an der Universität Leipzig herausgerissen, sondern lebte, insbesondere seit seiner Verurteilung durch das Parteigericht im Jahre 1942, als politisch Verdächtigter unter dem ständigen Druck der Verfolgung. Alle diese Umstände sind in seinem Falle schwerwiegende Nachteile im Sinne des Gesetzes.

Der Tatbestand des Art. 13 ist somit gegeben. Der Betroffene war demgemäß in die Gruppe der Entlasteten einzureihen. Das Verfahren gegen ihn war einzustellen.

Da seine Berufung Erfolg hatte, waren die Kosten der Staatskasse aufzuerlegen. (Art. 57, § 5 der Gebührenordnung.)

*Plügg*

gez. Dr. Plügg

Dieser Spruch hat Rechtskraft erlangt

München, den 3.6.48

Geschäftsstelle der Besatzungskammer für München

*Trippel*

(Trippel)

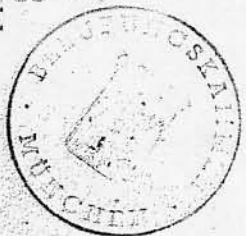

Supplement: 33_AppealCourt1948.pdf [file 33_AppealCourt1948.pdf]
